# Supplementary figures and images for: Urine volatile organic compounds in predicting chronic obstructive pulmonary disease risk in a national observational study
Source: Royal Society of Chemistry journal article supplement (doi:10.1039/d5em00181a), 2025-01-01

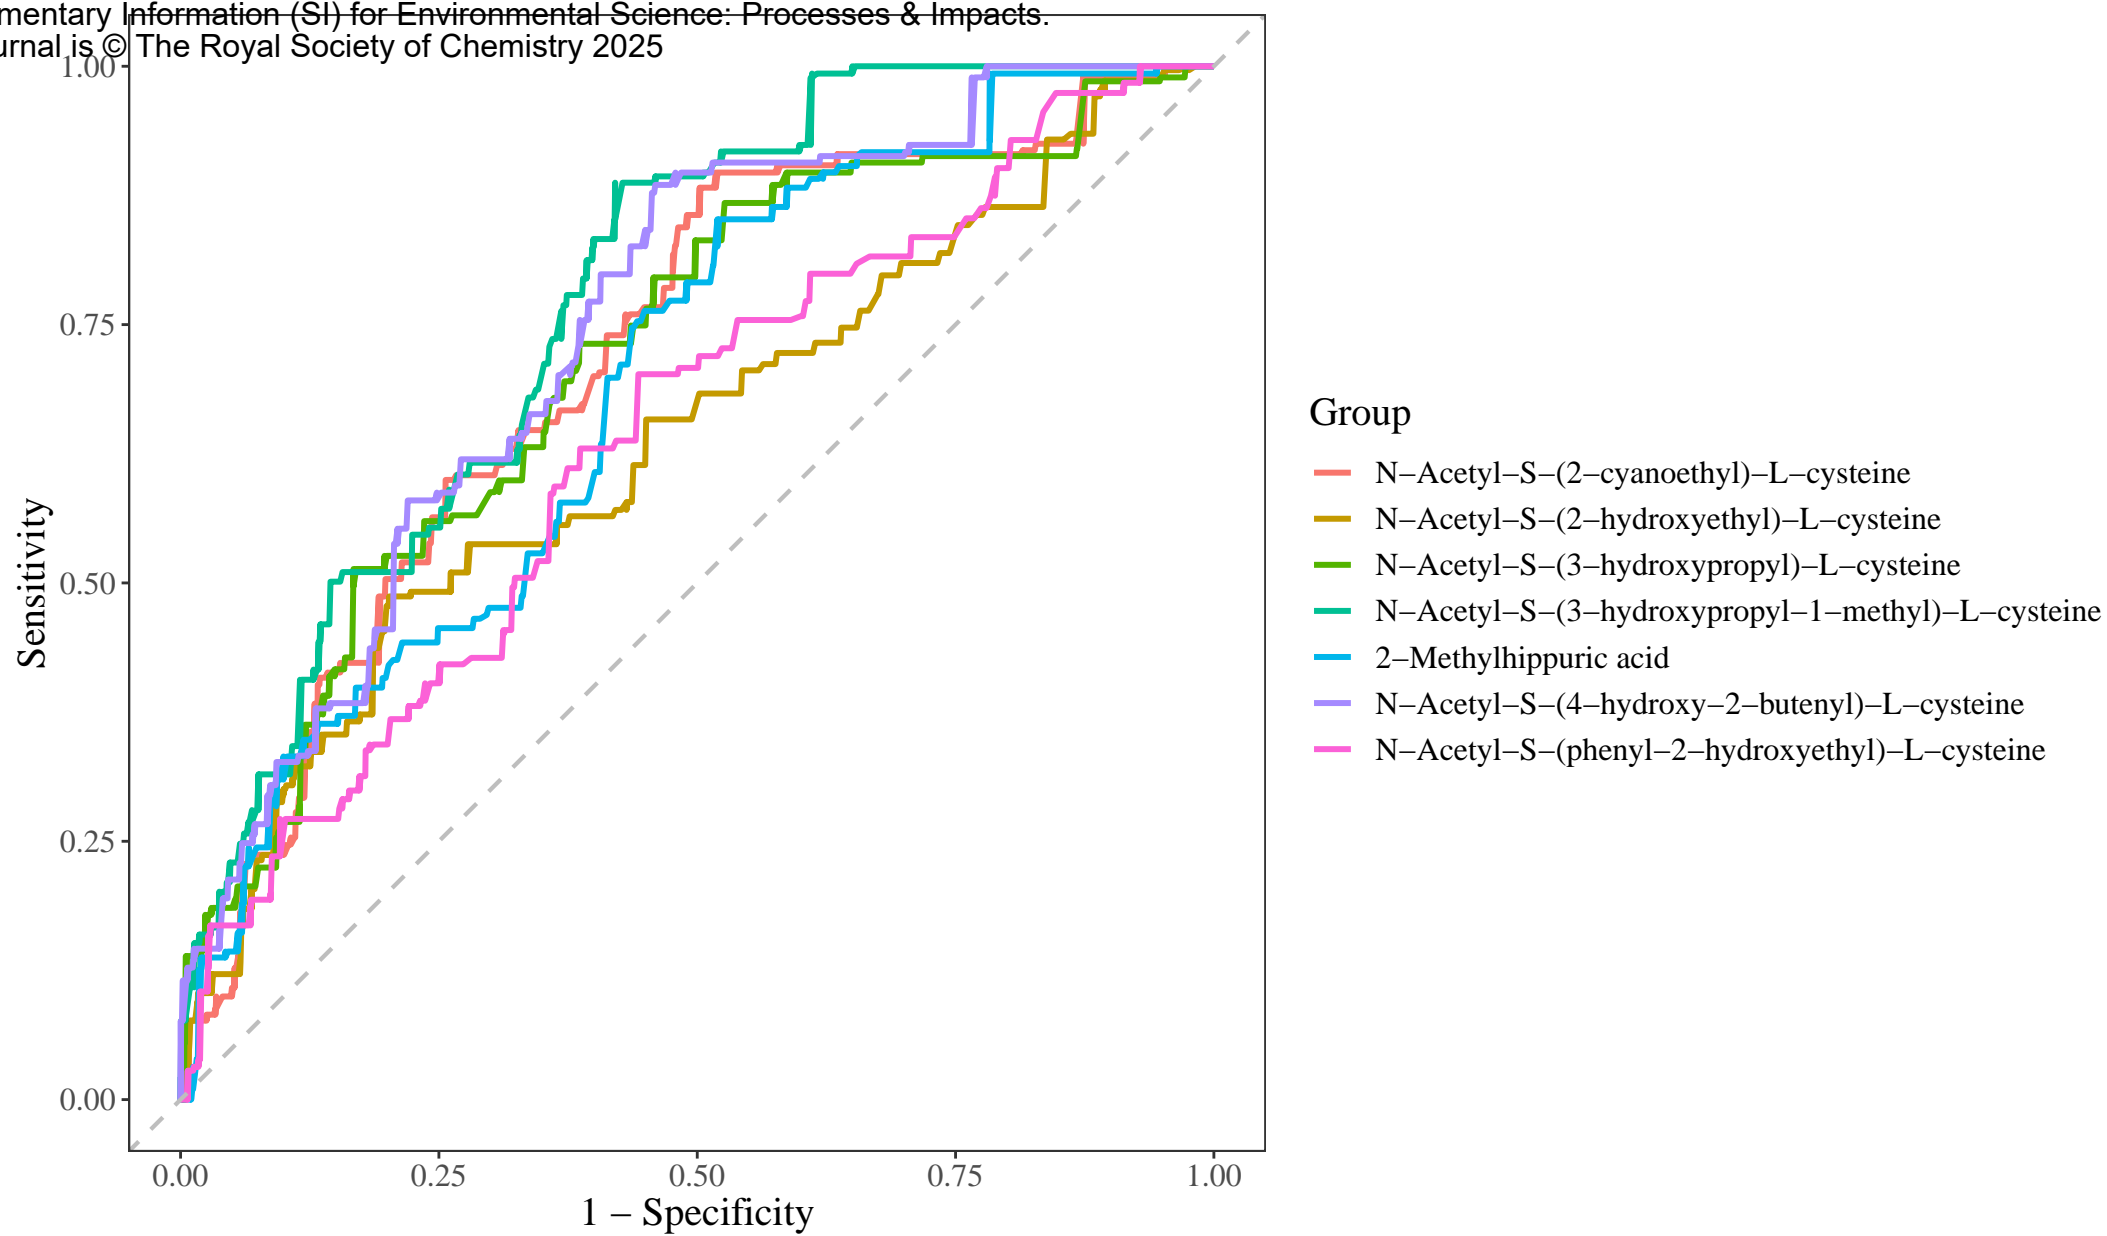

Supplement: d5em00181a4.pdf [file d5em00181a4.pdf]
